# Supplementary material for: The apical ectodermal ridge of the mouse model of ectrodactyly Dlx5;Dlx6−/− shows altered stratification and cell polarity, which are restored by exogenous Wnt5a ligand
Source: PubMed Central journal article supplement — Hum Mol Genet. 2015 Dec 18;25(4):740–54. doi: 10.1093/hmg/ddv514 (PMC4743692; doi:10.1093/hmg/ddv514), 2015-12-18
Supplement: supp_ddv514_ddv514supp.pdf [file supp_ddv514_ddv514supp.pdf]

## Supplementary Figures

### Supplementary Figure 1.

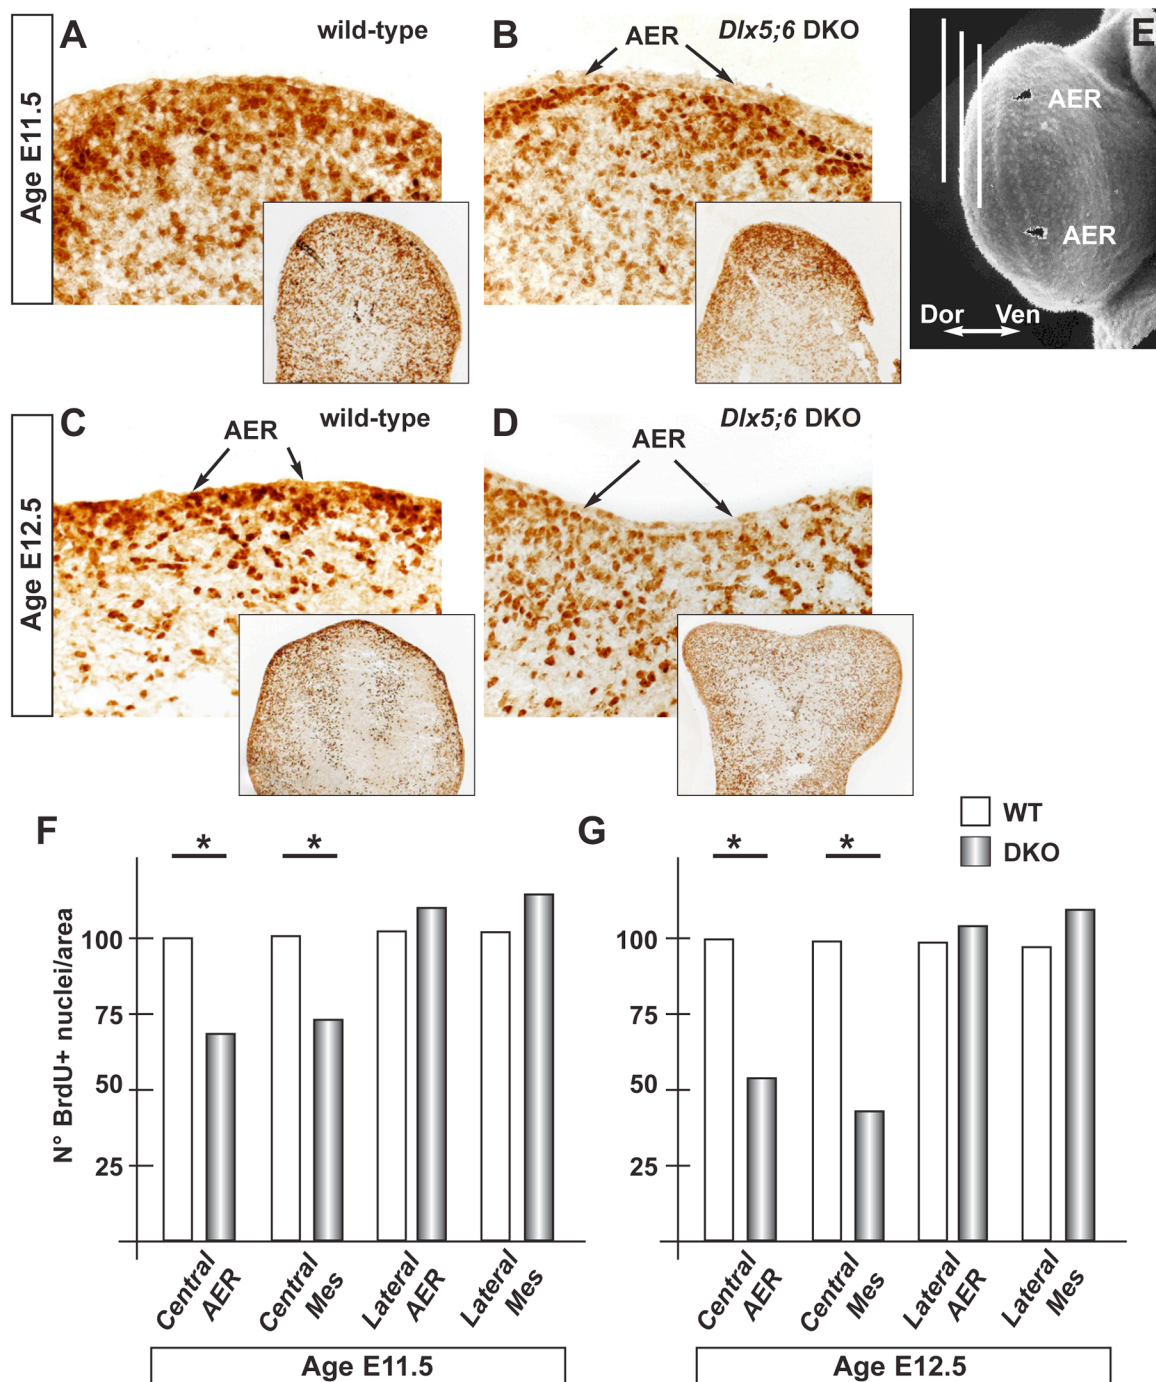

BrdU incorporation in WT and *Dlx5;6* DKO hindlimbs. Two embryonic ages are shown: E11.5 (top) and E12.5 (bottom). **A-D.** WT limbs are on the left, *Dlx5;6* DKO limbs are on the right. **E.** Schematic diagram to show the section plane used for this analysis. The inserts show a low magnification of the same. **F,G.** Quantification of the number of BrdU+ nuclei/area observed in the AER and in the underlying mesenchyme at E 11.5 (F) and E12.5 (G). The central and the lateral sectors were counted separately since ectrodactyly is essentially a middle-ray malformation (see micrograph in D). WT is made =100%. Asterisks indicate statistical significance. Note a significant decrease of proliferation in the AER and mesenchyme of the central sector, and an increase in the lateral mesenchyme.

**Supplementary Figure 2.**

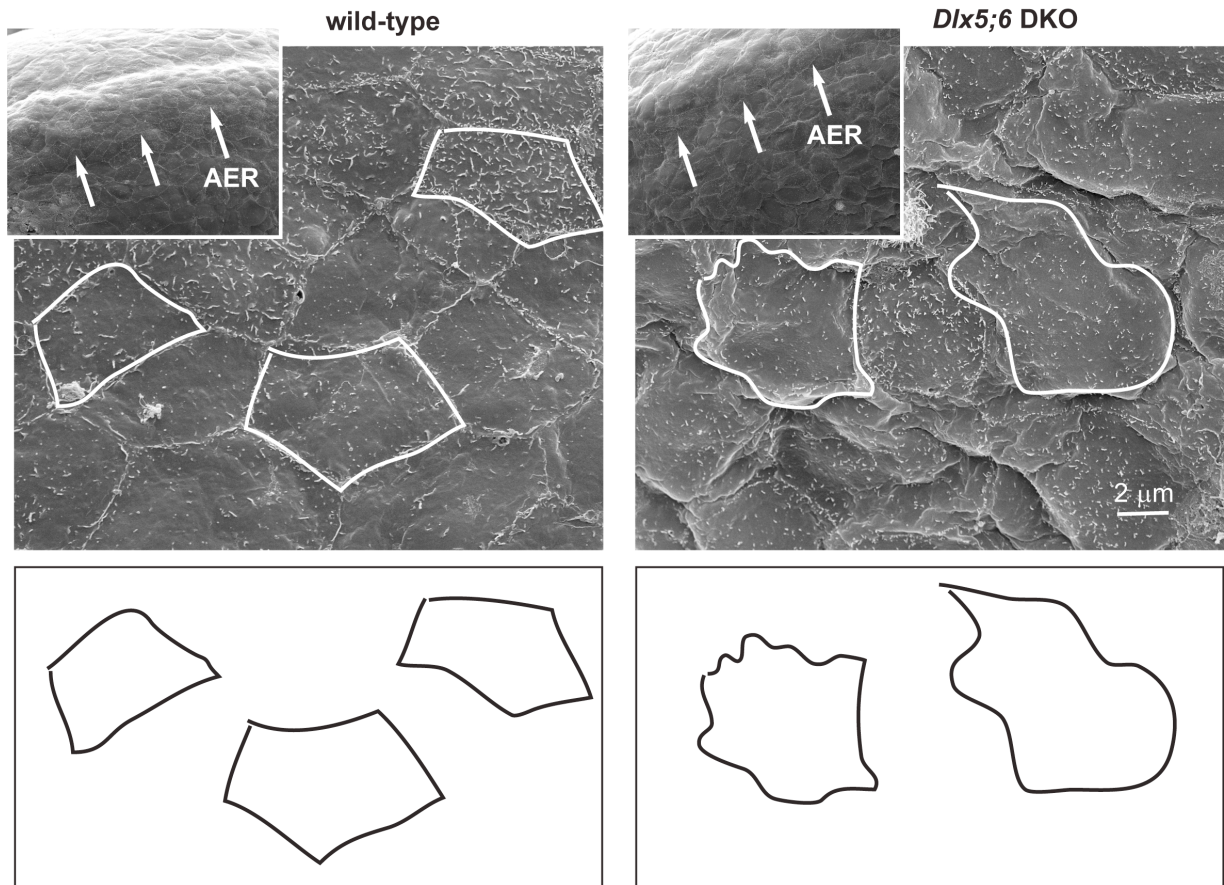

Morphology of AER cells of WT (on the left) and *Dlx5;6* DKO (on the right) hindlimbs, observed by SEM. Inserts report lower magnification of the same. The contour of some of the WT and *Dlx5;6* DKO epithelial cells is reported below.

**Supplementary Figure 3.**

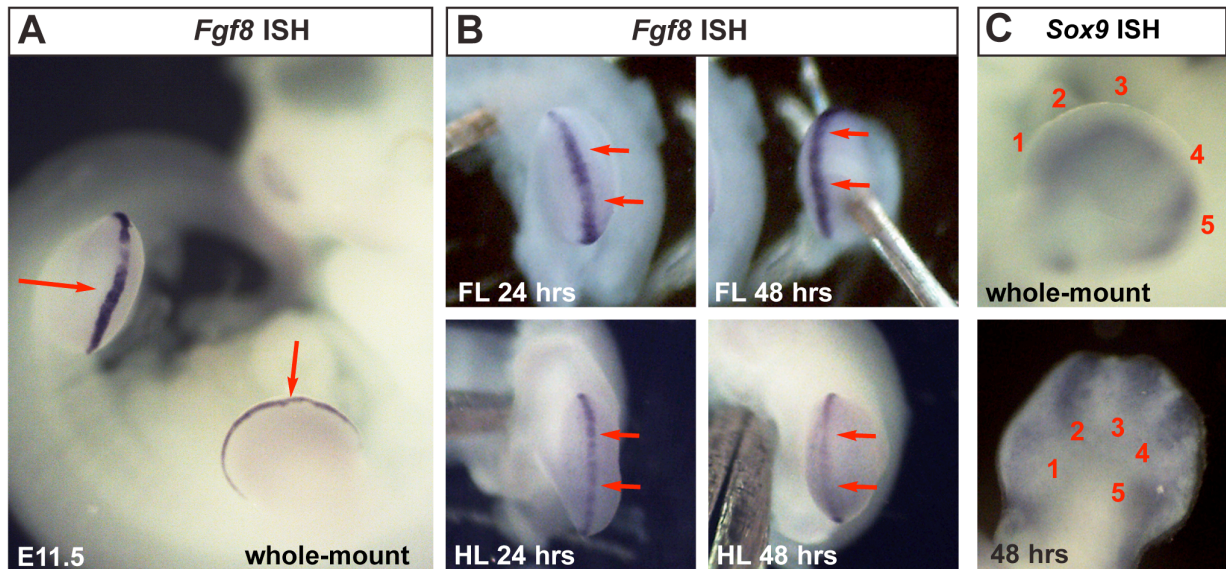

*Ex-vivo* cultures of whole limbs maintain the AER and the early mesenchymal condensations. **A.** Whole mount *in situ* hybridization on a WT E11.5 embryos, to detect the *FGF8* mRNA. **B.** Forelimbs (top panels) and hindlimbs (bottom panels) collected at the embryonic age E11, and cultured *ex vivo* for 24 hrs (on the left) or 48 hrs (on the right), hybridized to detect the *FGF8* mRNA. The AER is indicated (red arrows). **C.** Whole mount *in situ* hybridization on hindlimbs collected at the embryonic age E11.5 and cultured *ex-vivo* for 48 hrs, to detect the *Sox9* mRNA. The presumptive digits are indicated (red numbers).

**Supplementary Figure 4.**

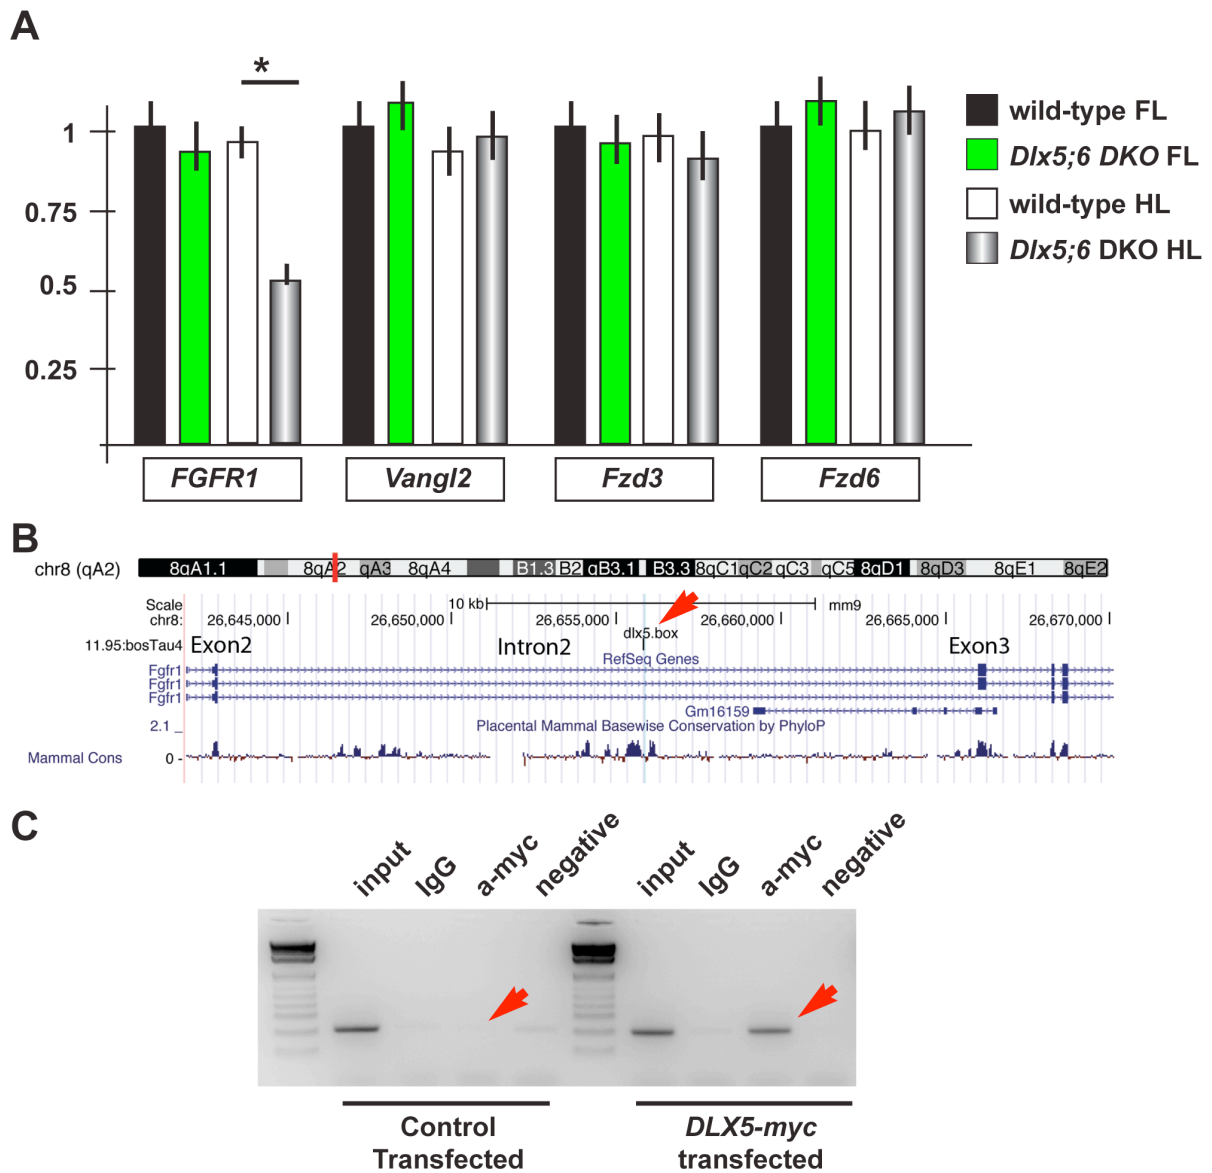

*Fgfr1* is a target of *Dlx5* and is downregulated in *Dlx5;6* DKO limbs. **A.** Relative abundance of *Fgfr1*, *Vangl2*, *Fzd3* and *Fzd6* mRNAs in WT and *Dlx5;6* DKO forelimbs and hindlimbs, by Real-Time qPCR. Asterisks indicate statistical significance. **B.** Predicted DLX5 binding sites in the intron 2 of the *Fgfr1* locus, conserved in mammalian species (red arrowheads), annotated on the UCSC mouse genome browser. Exons and mammalian conservation are shown. **C.** ChIP analysis of the *Fgfr1* promoter region containing a predicted *Dlx5* binding site, in SH-SY5Y cells transfected with WT *DLX5-myc tag* expression vectors. Immunoprecipitation was done with anti-myc antibody. Red arrowheads indicate specific signal.
